# Supplementary material for: Airborne observation with a low-cost hyperspectral instrument: retrieval of NO 2 vertical column densities (VCDs) and the satellite sub-grid variability over industrial point sources
Source: Copernicus journal article supplement (doi:10.5194/amt-17-197-2024), 2024-01-15
Supplement: Supplementary file 1 [file amt-17-197-2024-supplement.pdf]

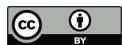

*Supplement of*

**Airborne observation with a low-cost hyperspectral instrument: retrieval of NO<sub>2</sub> vertical column densities (VCDs) and the satellite sub-grid variability over industrial point sources**

**Jong-Uk Park et al.**

*Correspondence to:* Sang-Woo Kim ([sangwookim@snu.ac.kr](mailto:sangwookim@snu.ac.kr))

The copyright of individual parts of the supplement might differ from the article licence.

# Supplementary Tables

**Table S1.** Column integrated AOD and SSA values used for the LUT construction for each research flight, observed from the nearest AERONET site.

| <b>Variables<br/>(Acronym)</b>     | <b>17 OCT 2020<br/>(Chungnam)</b> | <b>3 NOV 2020<br/>(Jaechon)</b>      | <b>5 NOV 2020<br/>(Pohang)</b>       | <b>24 NOV 2022<br/>(Chungnam)</b> | <b>25 NOV 2022<br/>(Chungnam)</b> |
|------------------------------------|-----------------------------------|--------------------------------------|--------------------------------------|-----------------------------------|-----------------------------------|
| <b>AOD (440 nm)</b>                | 0.18                              | 0.09                                 | 0.21                                 | 0.35                              | 0.28                              |
| <b>SSA (440 nm)</b>                | 0.925                             | 0.96                                 | 0.96                                 | 0.937                             | 0.944                             |
| <b>AERONET site<br/>(Lat, Lon)</b> | Anmyon<br>(36.539N, 126.330E)     | Gangneung_WNU<br>(37.771N, 128.867E) | Gangneung_WNU<br>(37.771N, 128.867E) | Anmyon<br>(36.539N, 126.330E)     | Anmyon<br>(36.539N, 126.330E)     |

7 **Table S2.** Reference conditions for the sensitivity test per research flights

| <b>Variables<br/>(Acronym)</b> | <b>17 OCT 2020<br/>(Chungnam)</b> | <b>3 NOV 2020<br/>(Jaechon)</b> | <b>5 NOV 2020<br/>(Pohang)</b> | <b>24 NOV 2022<br/>(Chungnam)</b> | <b>25 NOV 2022<br/>(Chungnam)</b> |
|--------------------------------|-----------------------------------|---------------------------------|--------------------------------|-----------------------------------|-----------------------------------|
| <b>NO<sub>2</sub> VCD</b>      | 1.00 DU                           | 1.00 DU                         | 1.00 DU                        | 1.00 DU                           | 1.00 DU                           |
| <b>PBLH</b>                    | 1.0 km                            | 1.0 km                          | 1.0 km                         | 1.0 km                            | 1.0 km                            |
| <b>ALB</b>                     | 0.15                              | 0.15                            | 0.15                           | 0.15                              | 0.15                              |
| <b>SZA</b>                     | 48 °                              | 54 °                            | 54 °                           | 57 °                              | 57 °                              |
| <b>ALT</b>                     | 1,600 m                           | 1,600 m                         | 2,900 m                        | 1,500 m                           | 1,700 m                           |
| <b>VZA</b>                     | 0 °                               | 0 °                             | 0 °                            | 0 °                               | 0 °                               |
| <b>RAA</b>                     | 0 °                               | 0 °                             | 0 °                            | 0 °                               | 0 °                               |

8

9

0 **Table S3.** Details of research flight for the airborne HIS observation. (See Fig. 4 for the acronyms of industrial  
1 NO<sub>2</sub> point sources)

| <b>Date</b>      | <b>Target domain</b> | <b>Potential emission point sources</b> | <b>Airplane type</b> |
|------------------|----------------------|-----------------------------------------|----------------------|
| 17 October 2020  | Chungnam             | PP, PC, SY                              | Cessna 208           |
| 3 November 2020  | Jaechon              | CK                                      | Cessna 208           |
| 5 November 2020  | Pohang               | SY                                      | Cessna 208           |
| 24 November 2022 | Chungnam             | PP, PC, SY                              | Beechcraft 1900D     |
| 25 November 2022 | Chungnam             | PP, PC, SY                              | Beechcraft 1900D     |

2

3

# 4 Supplementary Figures

5

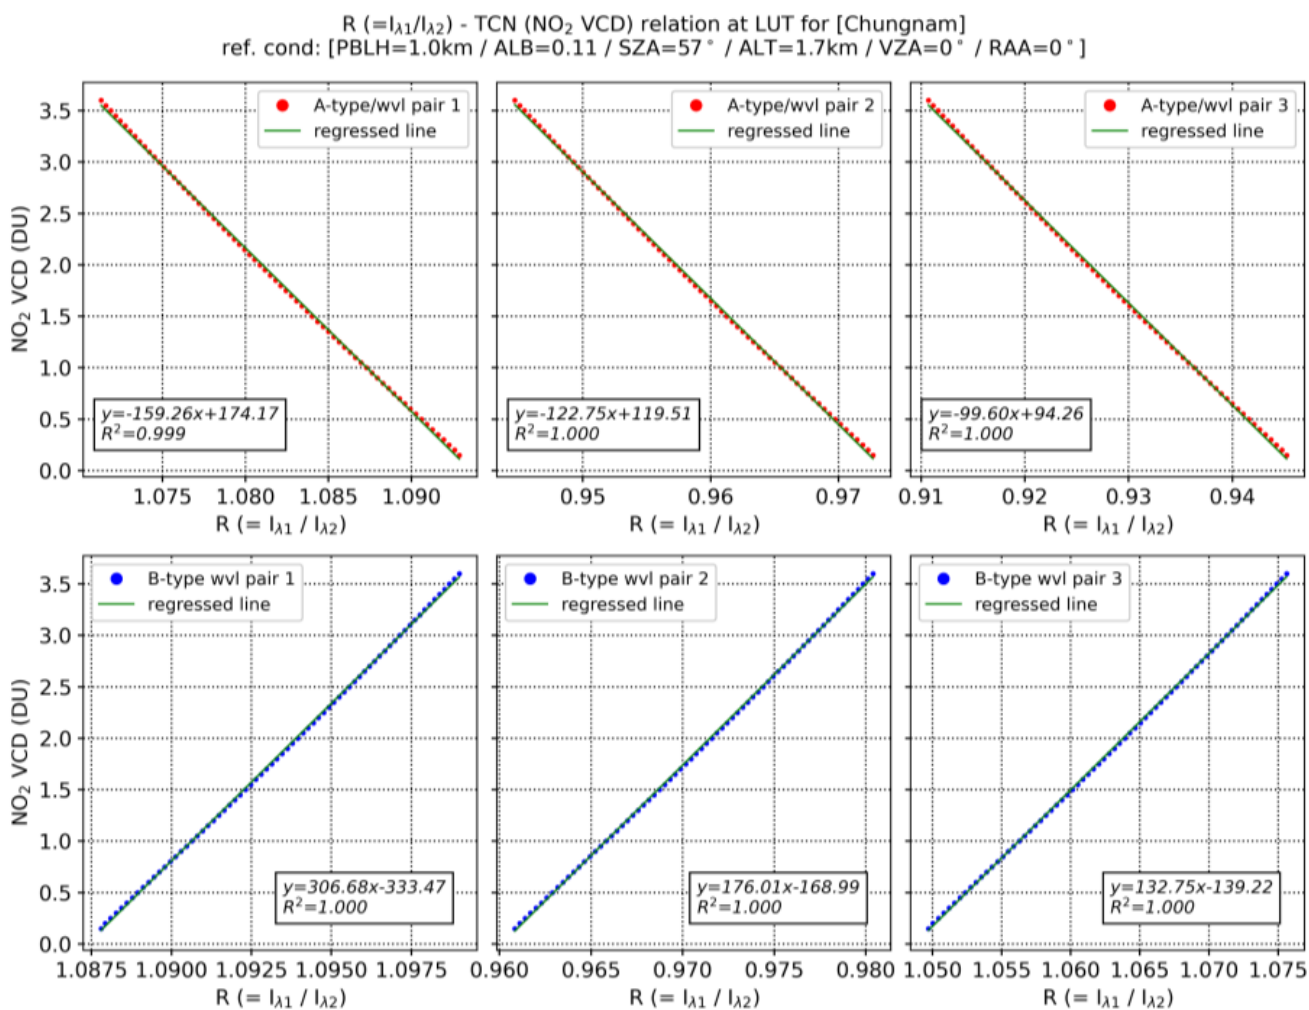

6

7 **Figure S1.** Relationship between R values of the wavelength pairs and the NO<sub>2</sub> VCDs based on forward RTM  
 8 simulations.

9

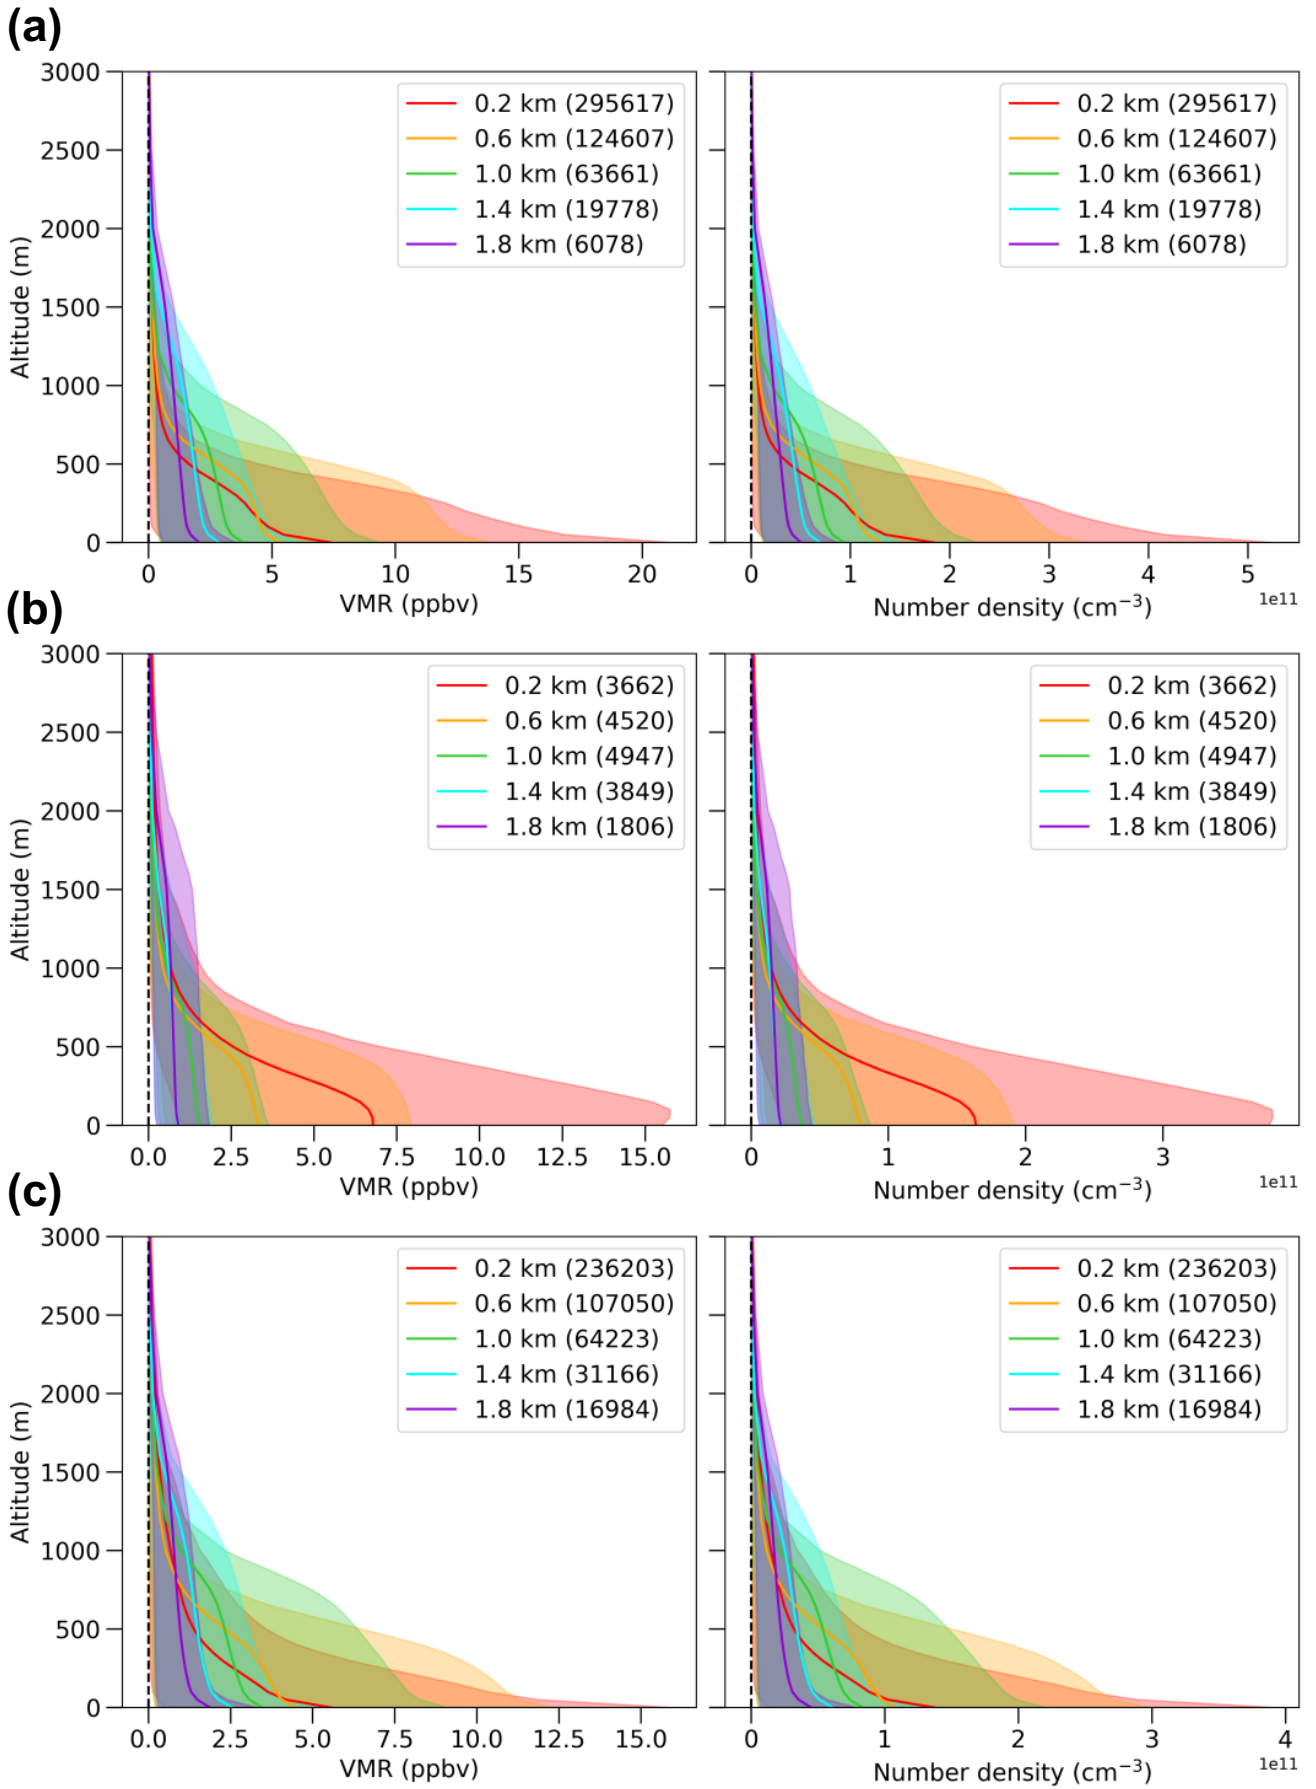

**Figure S2.** CMAQ-driven vertical profiles of NO<sub>2</sub> volume mixing ratio (left) and number densities (right) at (a) Chungnam, (b) Jaechon, and (c) Pohang domain according to the PBLH. The shaded area shows the 10<sup>th</sup> and 90<sup>th</sup> percentiles of NO<sub>2</sub> concentrations at each altitude per PBLH conditions, and the numbers in parentheses are the corresponding vertical profiles accounted for in the analysis.

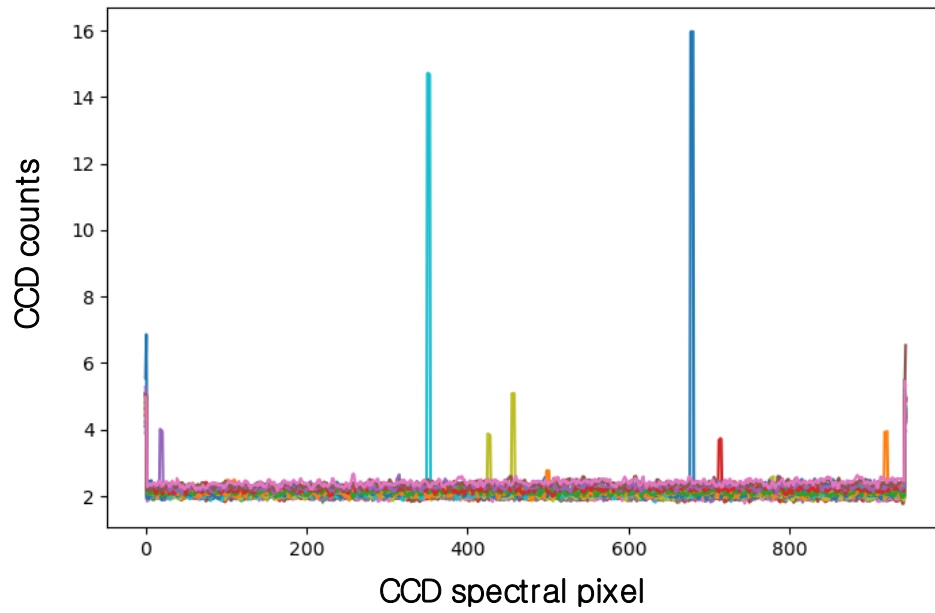

6

7 **Figure S3.** Random noise level per pre-binned spatial pixels (binning 50 raw spatial CCD columns; shown in  
8 different colors) under integrated exposure time of 1 second.

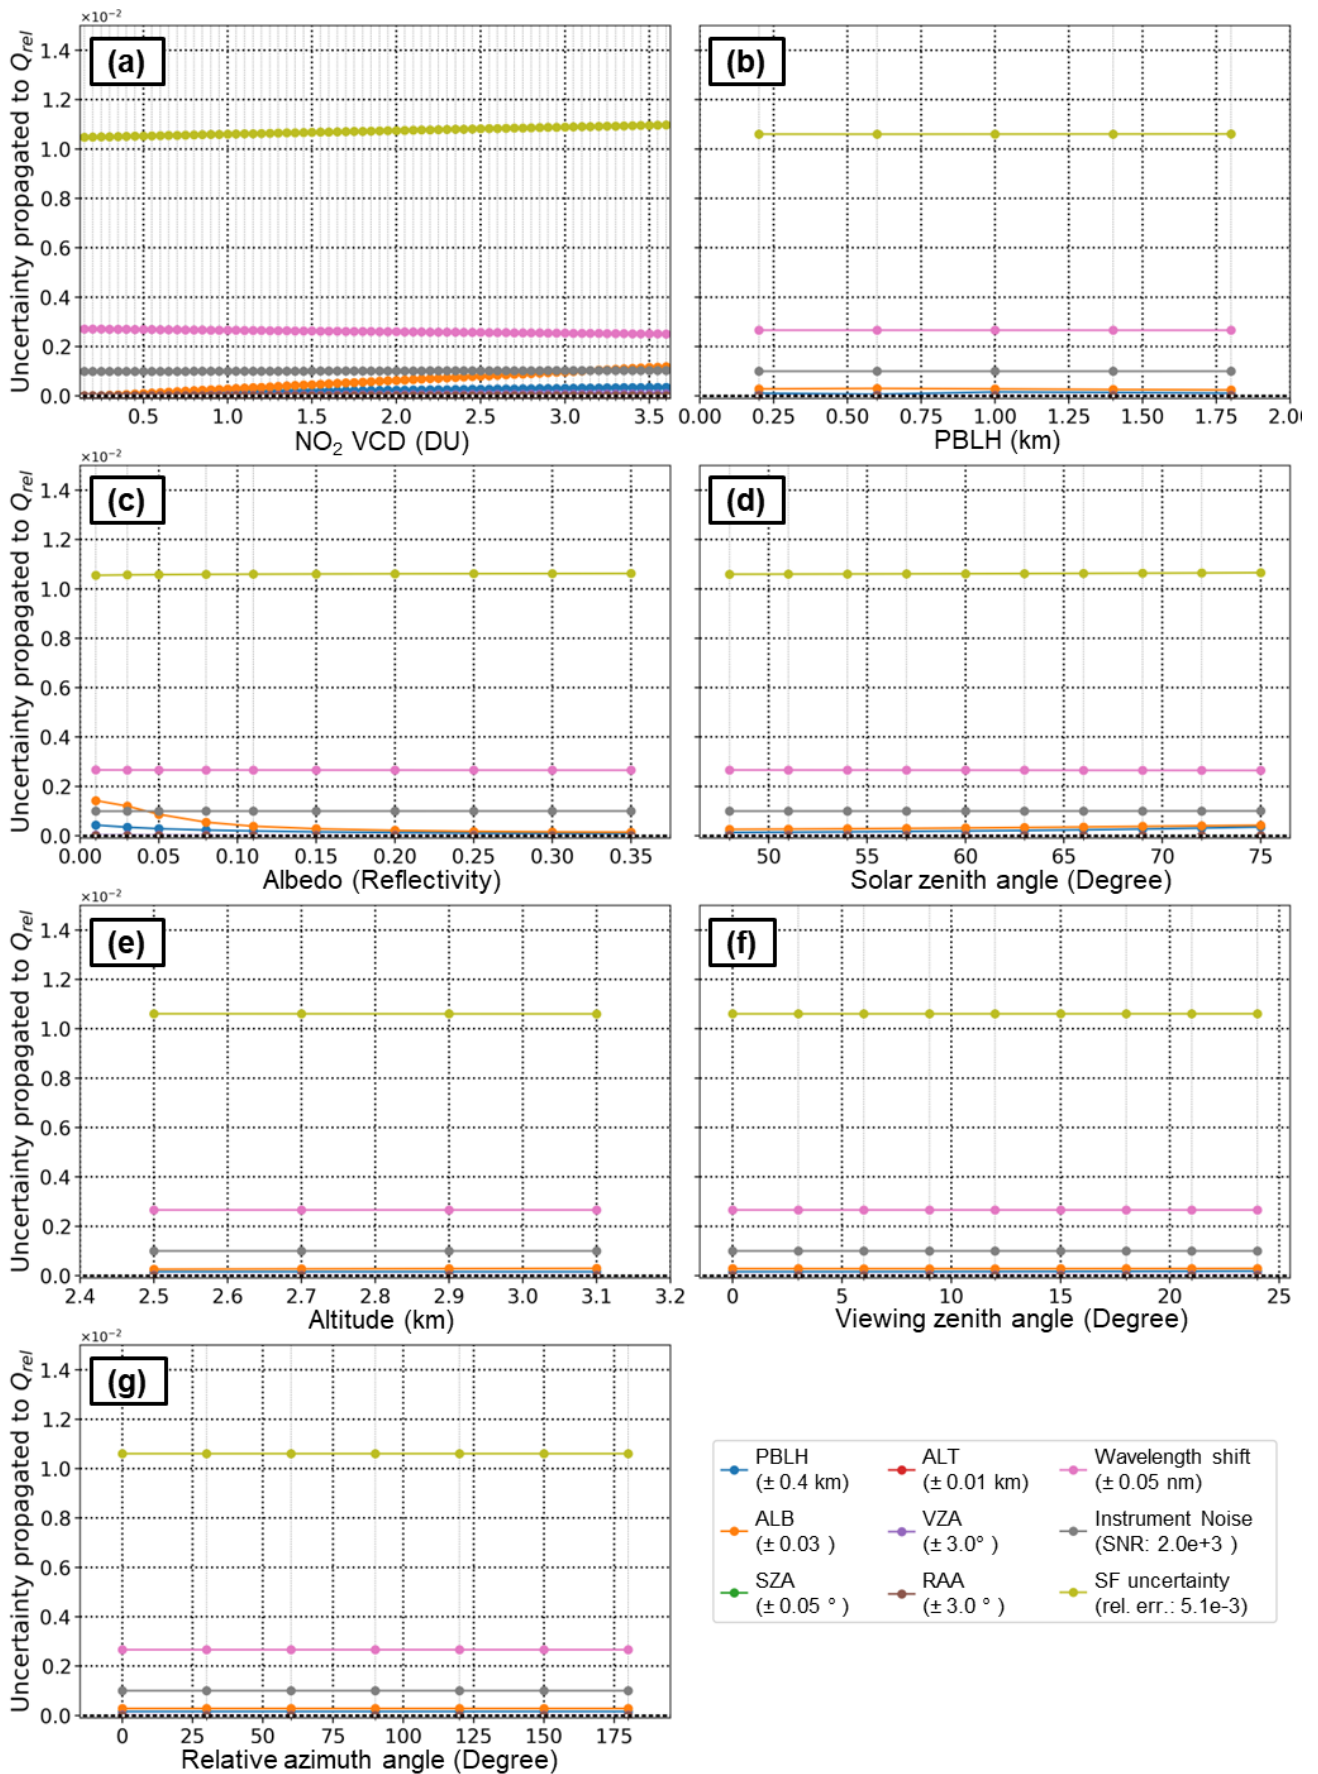

9

0 **Figure S4.** Sensitivity of Q-value calculated from simulated radiances at wavelength-pair 2 (i.e., Type\_A:  
 1 435.689, 437.015 nm; Type\_B: 433.037, 434.363 nm) depending on (a) NO<sub>2</sub> VCD, (b) PBLH, (c) albedo  
 2 (ALB; reflectivity), (d) solar zenith angle (SZA), (e) observation altitude (ALT), (f) viewing zenith angle  
 3 (VZA), and (g) relative azimuth angle (RAA) considering atmospheric condition at Pohang and its  
 4 corresponding reference conditions (shown in supplementary [Table S2](#)).



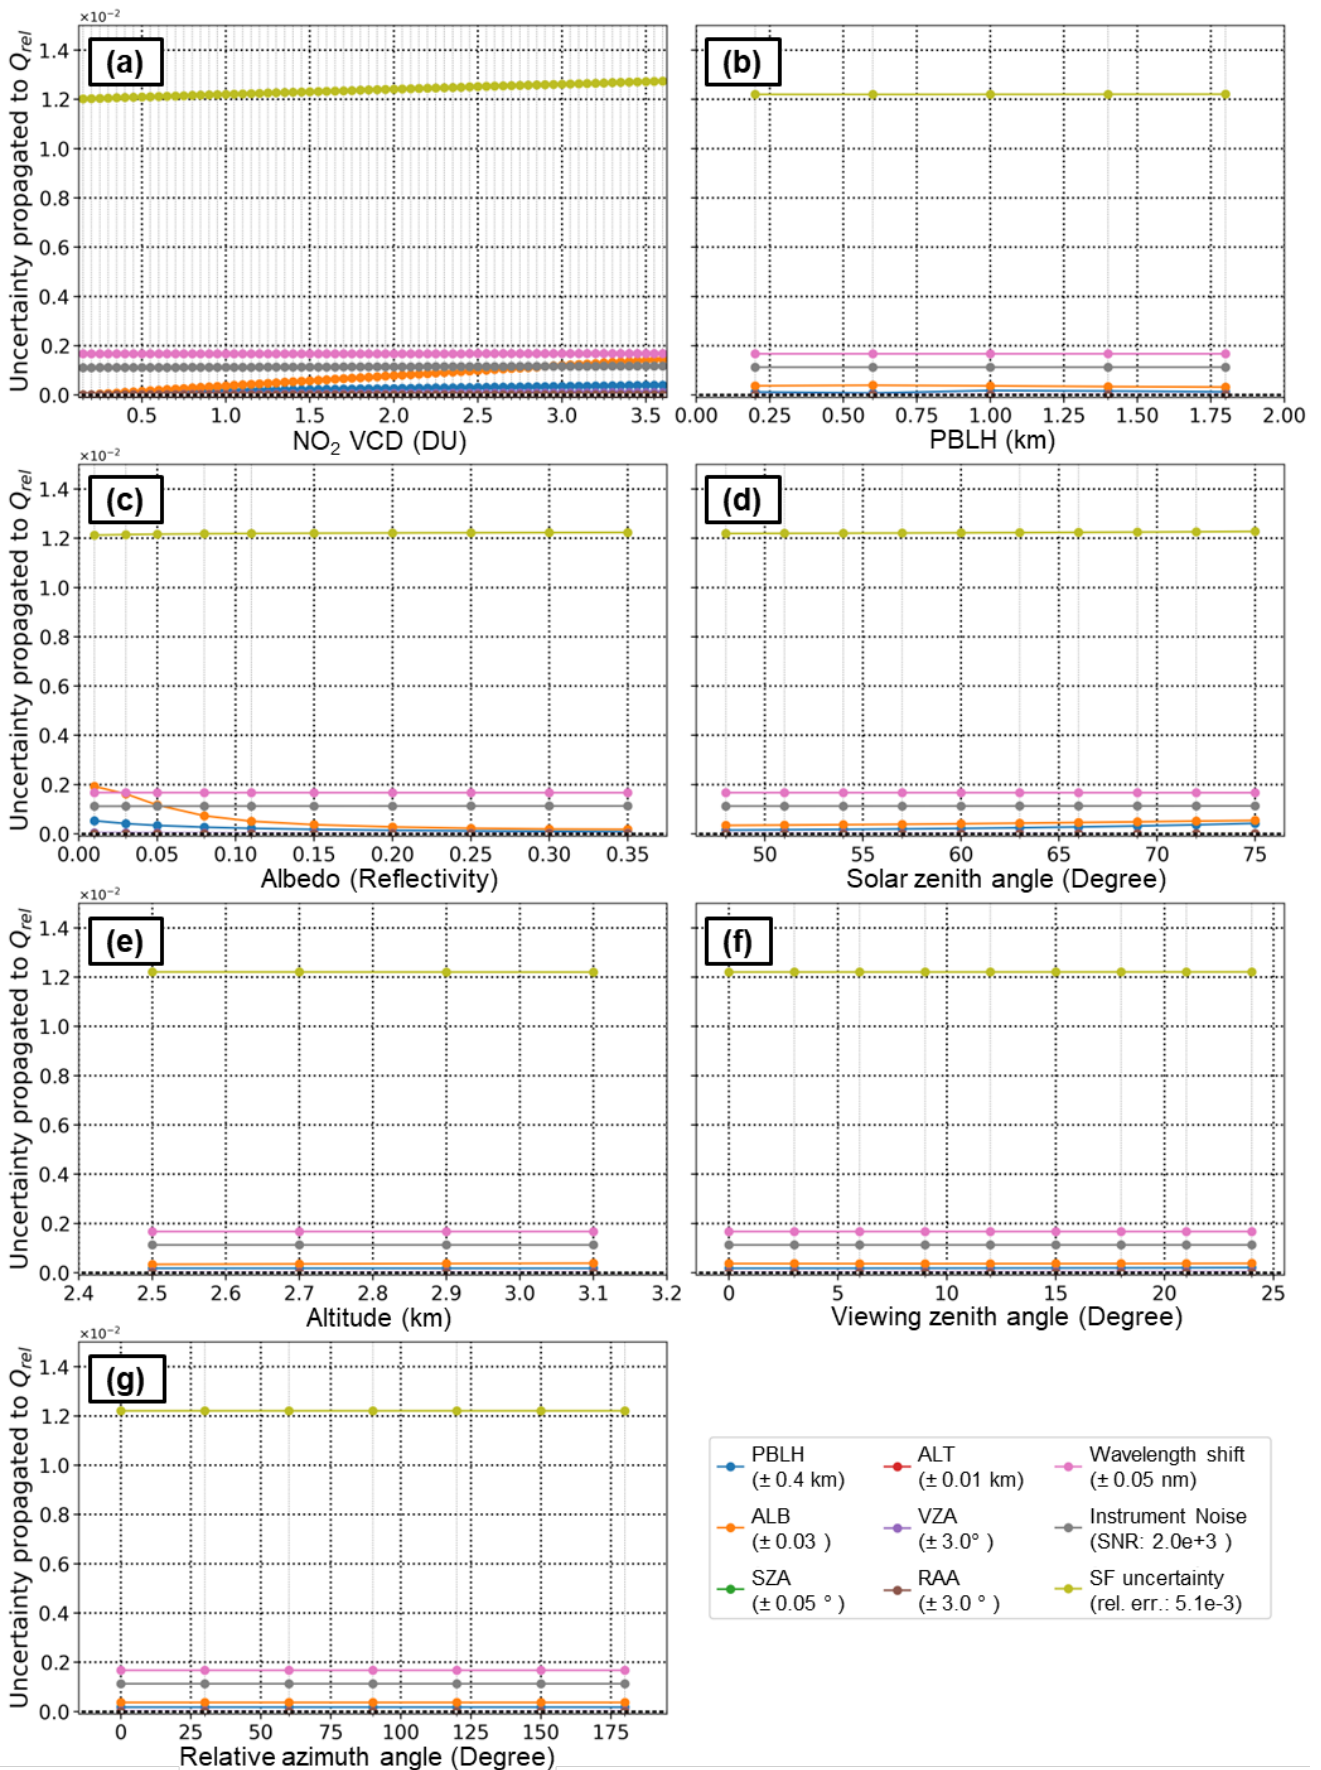

5

6 **Figure S5.** Sensitivity of Q-value calculated from simulated radiances at wavelength-pair 3 (i.e., Type\_A:  
7 439.932, 441.258 nm; Type\_B: 442.849, 444.175 nm) depending on (a) NO<sub>2</sub> VCD, (b) PBLH, (c) albedo  
8 (ALB; reflectivity), (d) solar zenith angle (SZA), (e) observation altitude (ALT), (f) viewing zenith angle  
9 (VZA), and (g) relative azimuth angle (RAA) considering atmospheric condition at Pohang and its  
0 corresponding reference conditions (shown in supplementary Table S2).

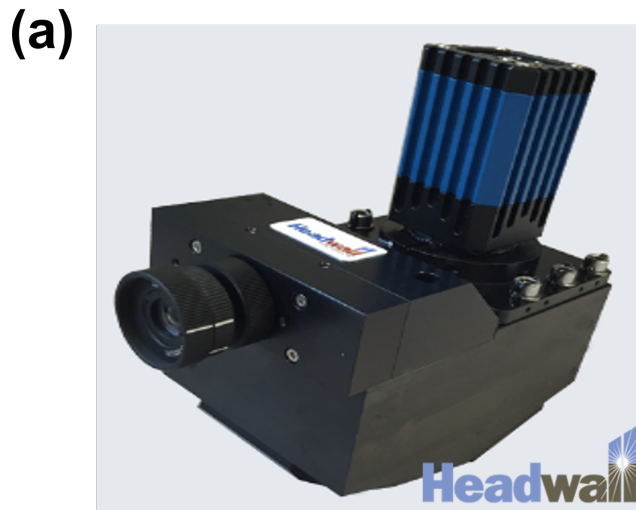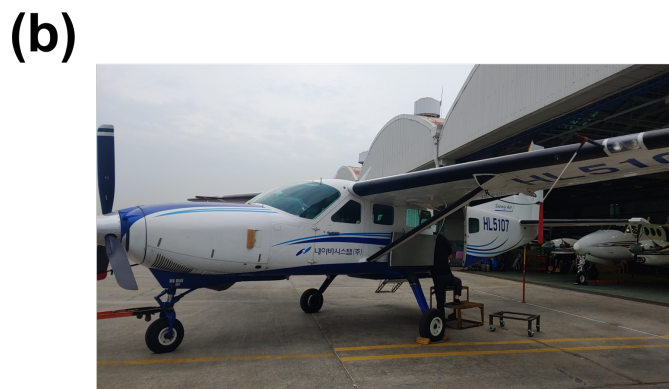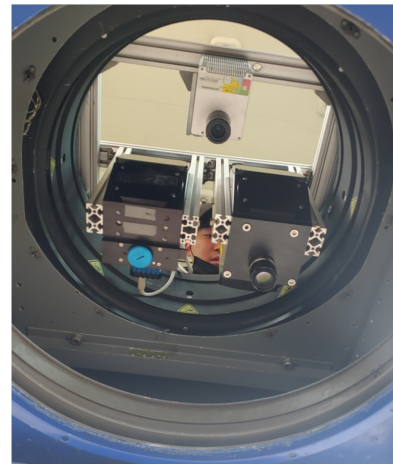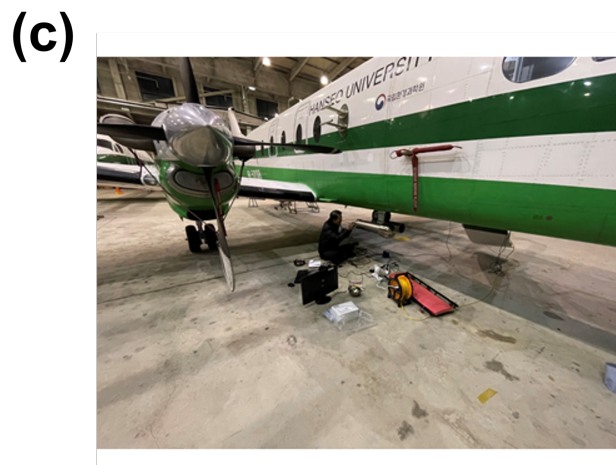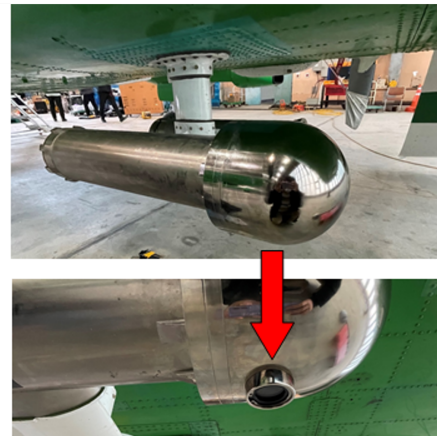

1

2 **Figure S6.** (a) The hyperspectral imaging sensor (HIS), manufactured by Headwall Photonics, Inc., used in  
3 this study. (b) Cessna 208 Caravan aircraft (left) and the HIS mounted configure on the camera hole of Cessna  
4 plane (right), and (c) Beechcraft 1900D (right) and the HIS mounted on an external canister on a pylon beneath  
5 an aircraft (left).

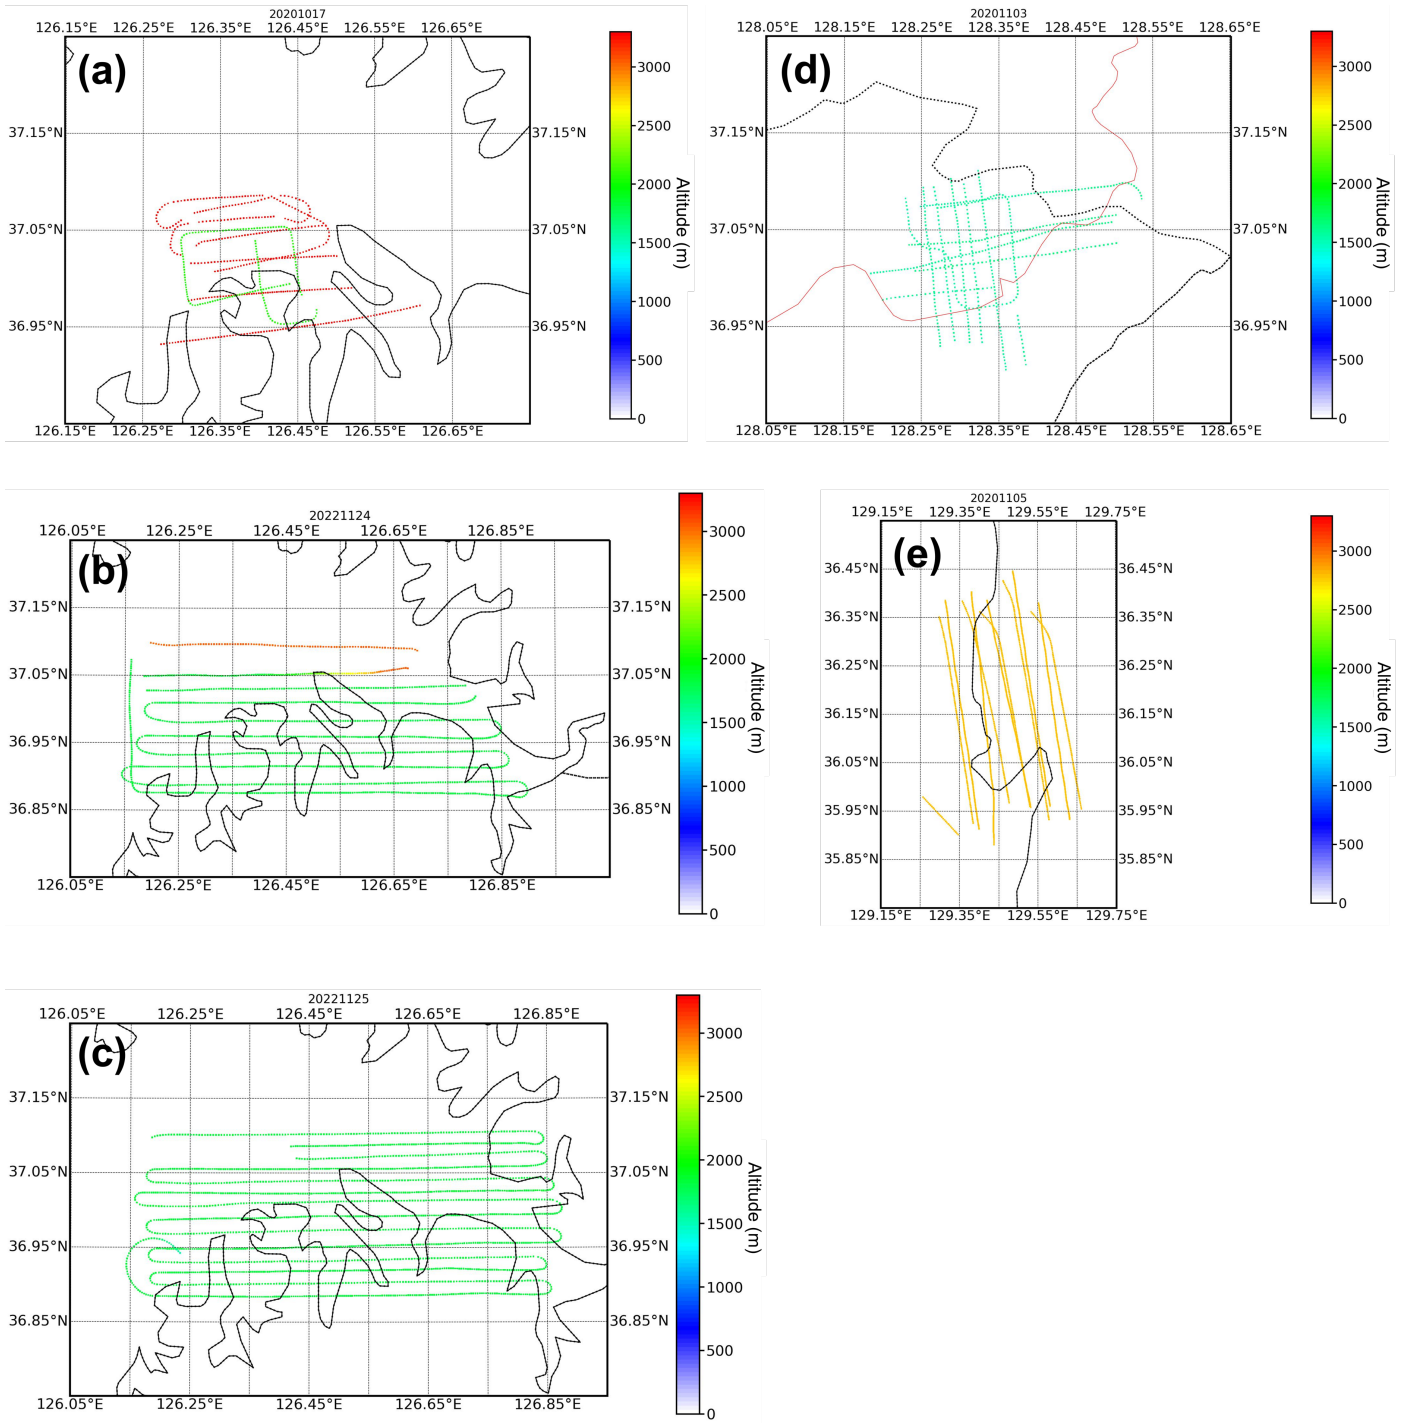

6

7 **Figure S7.** Routes and altitudes of research flights at Chungnam (a-c), Jecheon (d), and Pohang (e) area. Flight  
 8 dates are shown at the top of each figure.

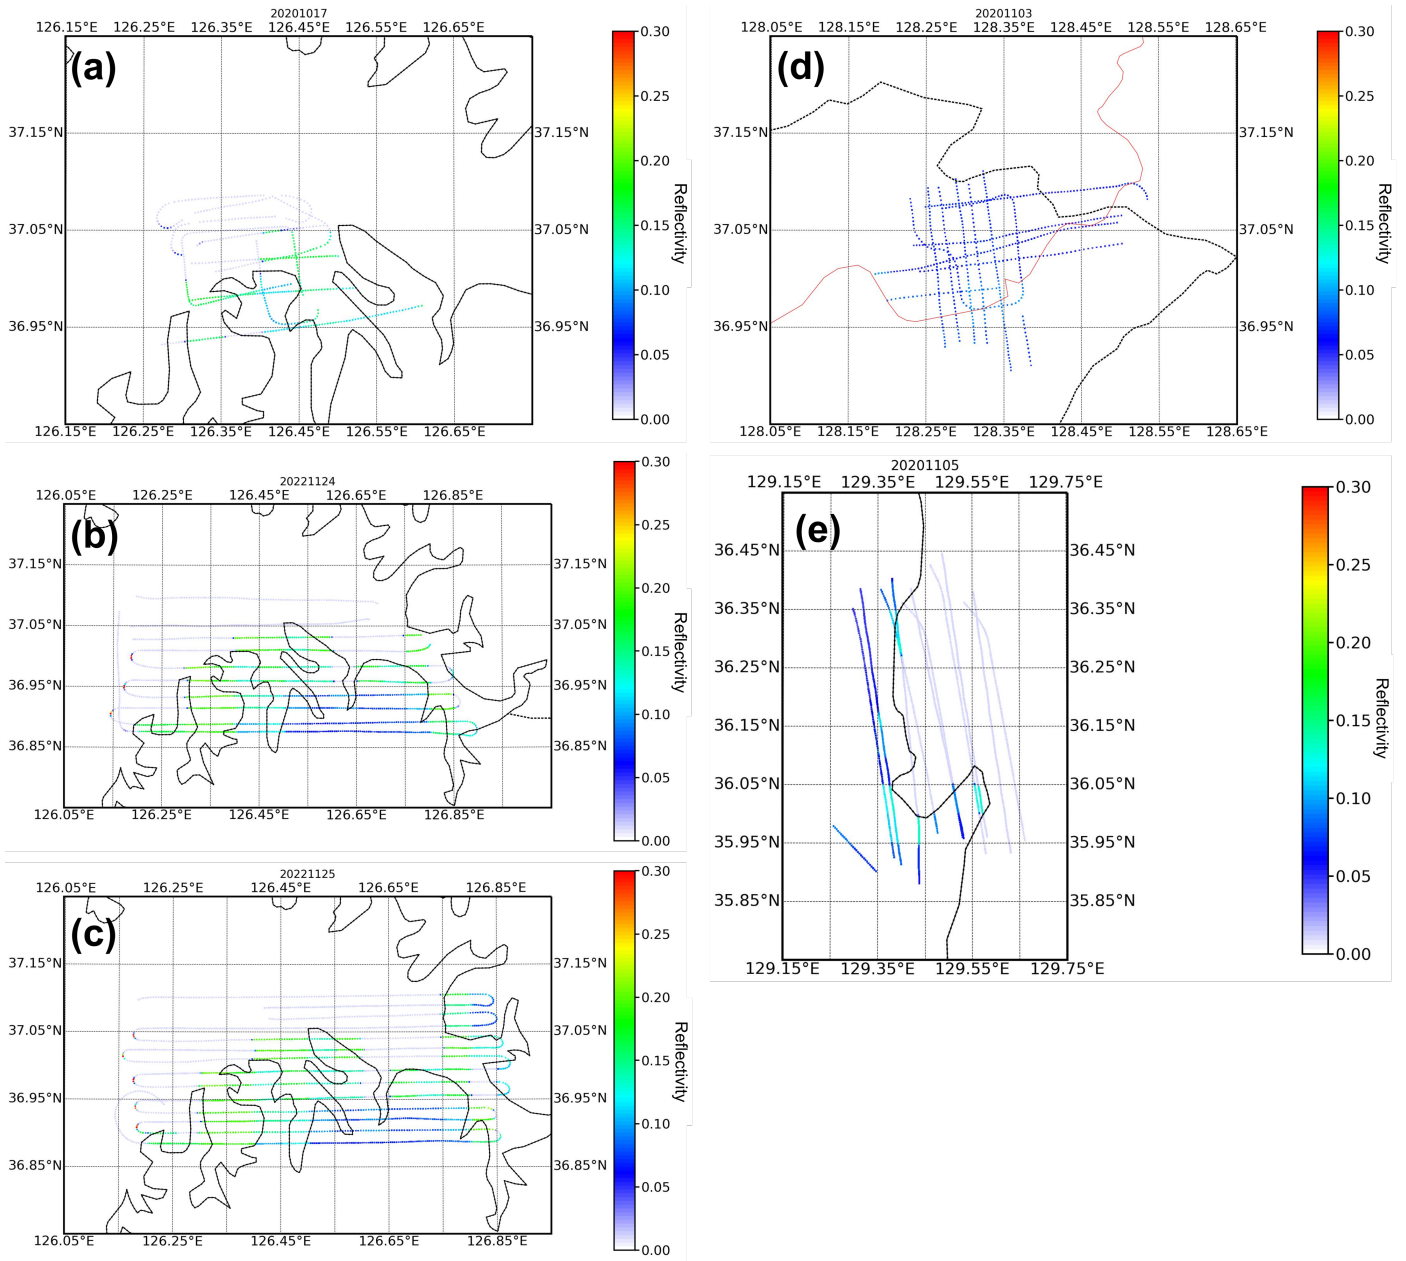

9

0 **Figure S8.** Effective Albedo calculated from VIIRS BRDF kernel and the HIS observation geometry along  
 1 the research flight track conducted at Chungnam (a-c), Jaechon (d), and Pohang (e) area. Flight dates are  
 2 shown at the top of each figure.

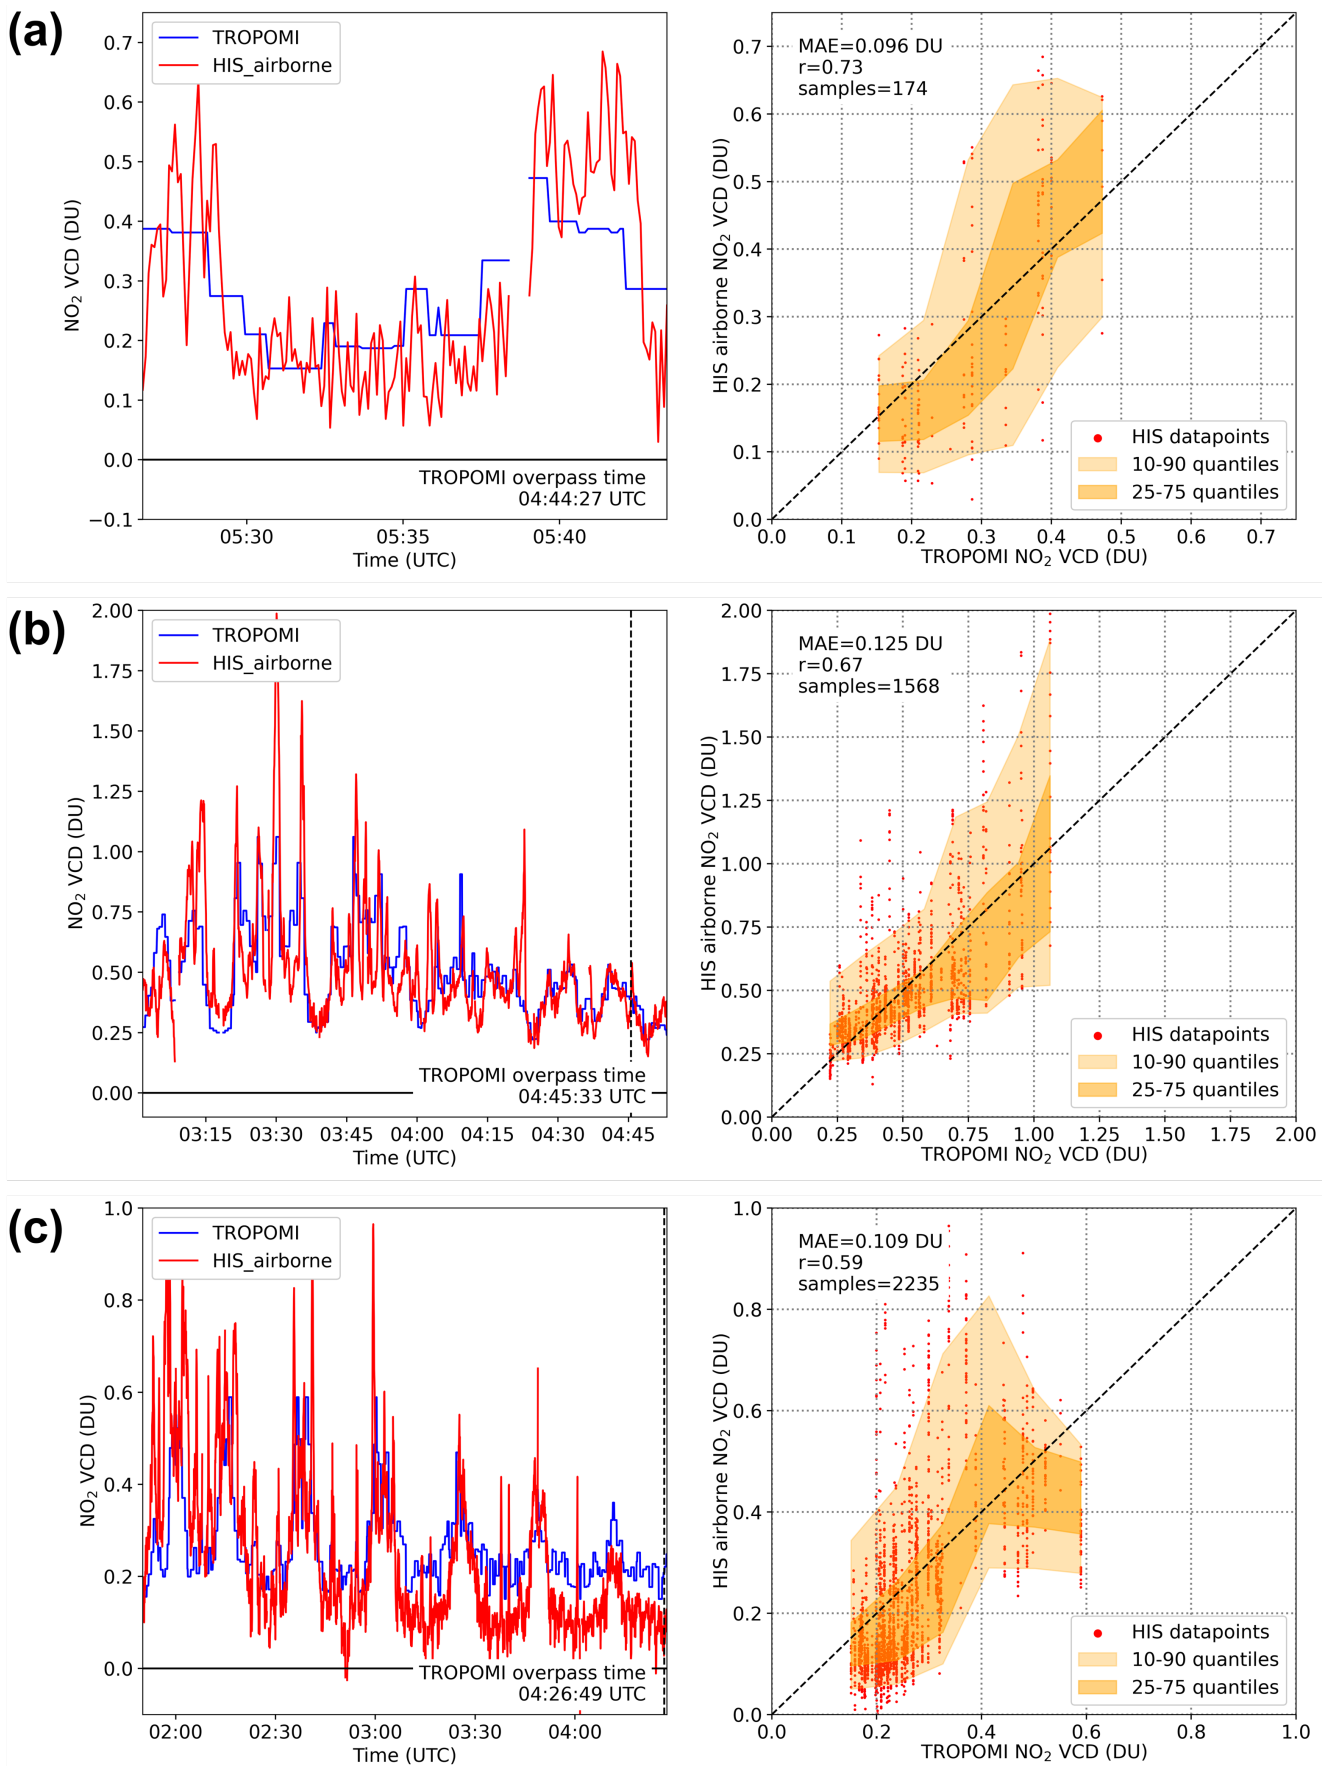

3

4 **Figure S9.** Time series of NO<sub>2</sub> VCD measured from HIS (red line) and TROPOMI (blue line) with TROPOMI  
 5 overpass time shown in vertical dashed line (left) and the scatter plot comparing the HIS and TROPOMI NO<sub>2</sub>  
 6 VCDs with the corresponding HIS NO<sub>2</sub> VCD quantiles (10, 25, 75, 90<sup>th</sup>) shown over the TROPOMI NO<sub>2</sub>  
 7 VCD range (right) for the research flight at (a) 17 October 2020, (b) 24 November 2022, and (c) 25 November  
 8 2022 over the Chungnam domain.

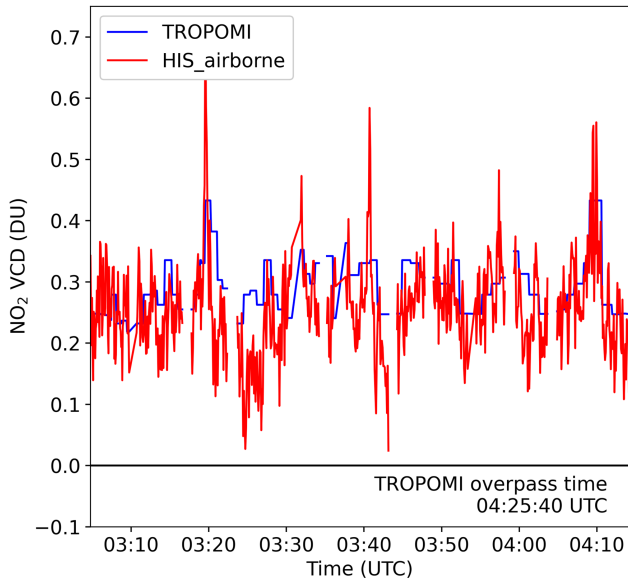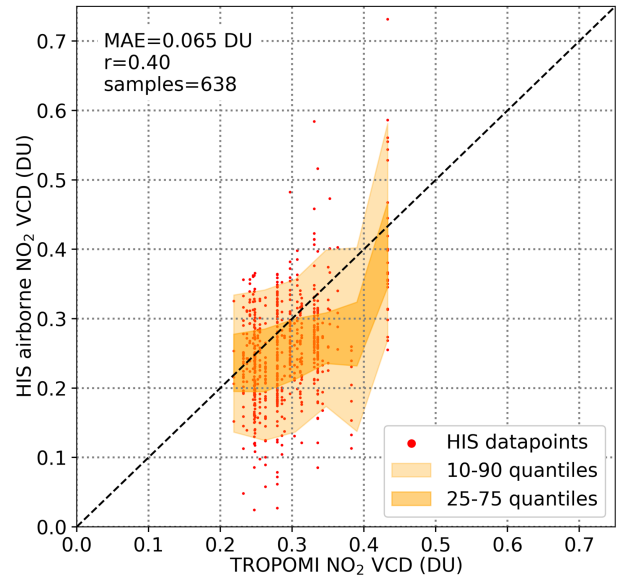

9

0 **Figure S10.** Time series of NO<sub>2</sub> VCD measured from HIS (red line) and TROPOMI (blue line) with  
 1 TROPOMI overpass time denoted (left) and the scatter plot comparing the HIS and TROPOMI NO<sub>2</sub> VCDs  
 2 with the corresponding HIS NO<sub>2</sub> VCD quantiles (10, 25, 75, 90<sup>th</sup>) shown over the TROPOMI NO<sub>2</sub> VCD range  
 3 (right) for the research flight on 3 November 2020 over the Jaechon domain.

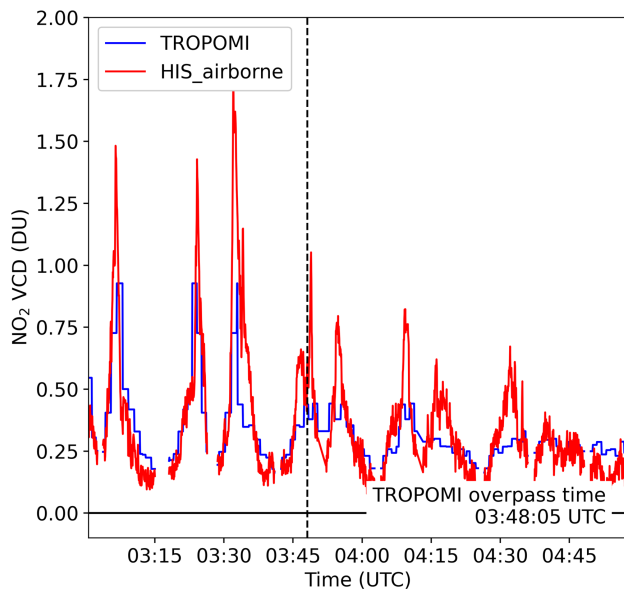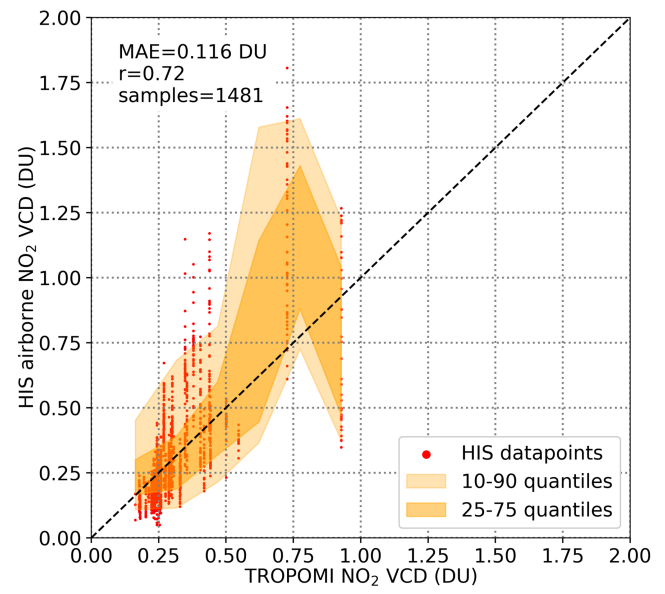

4

5 **Figure S11.** Time series of NO<sub>2</sub> VCD measured from HIS (red line) and TROPOMI (blue line) with  
 6 TROPOMI overpass time denoted (left) and the scatter plot comparing the HIS and TROPOMI NO<sub>2</sub> VCDs  
 7 with the corresponding HIS NO<sub>2</sub> VCD quantiles (10, 25, 75, 90<sup>th</sup>) shown over the TROPOMI NO<sub>2</sub> VCD range  
 8 (right) for the research flight on 5 November 2020 over the Pohang domain.
